# Supplementary material
Source: MDPI journal article supplement (https://www.mdpi.com/2227-9717/12/2/374)
Supplement: s1 [file s1]

# **Supercritical Direct-Methane-to-Methanol Coupled with Gas-to-Wire for Low-Emission Offshore Processing of CO<sub>2</sub>-Rich Natural Gas: Techno-Economic and Thermodynamic Analyses**

Alessandra de Carvalho Reis, Ofélia de Queiroz Fernandes Araújo, José Luiz de Medeiros\*

Escola de Química, Federal University of Rio de Janeiro, CT, E, Ilha do Fundão, Rio de Janeiro, RJ 21941-909, Brazil.

\*Corresponding author: jlm@eq.ufrj.br.

## **SUPPLEMENTARY MATERIALS**

**Table S1. Data for FCI calculation.**

Table S1. Data for FCI calculation.

| Equipment<br>Simulation<br>TAG | Equipment<br>Type | Capacity<br>Parameter<br>Value | Capacity<br>Correlation<br>Limit | FCI/Eq<br>Correlation<br>Prediction<br>(MMUSD) | FCI/Eq<br>Scale-up<br>Correction<br>(MMUSD) | Qty | Onshore<br>FCI/Eq<br>(MMUSD) | Offshore<br>FCI<br>Factor | Offshore<br>FCI/Eq<br>(MMUSD) |
|--------------------------------|-------------------|--------------------------------|----------------------------------|------------------------------------------------|---------------------------------------------|-----|------------------------------|---------------------------|-------------------------------|
| K-FC1                          | Compressor        | 1830 kW                        | 3000 kW                          | 2.87                                           | 2.87                                        | 1   | 2.87                         | 2                         | 5.73                          |
| K-FC2                          | Compressor        | 1917 kW                        | 3000 kW                          | 2.96                                           | 2.96                                        | 1   | 2.96                         | 2                         | 5.92                          |
| K-FC3                          | Compressor        | 1900 kW                        | 3000 kW                          | 2.94                                           | 2.94                                        | 1   | 2.94                         | 2                         | 5.88                          |
| K-FC4                          | Compressor        | 1907 kW                        | 3000 kW                          | 2.95                                           | 2.95                                        | 1   | 2.95                         | 2                         | 5.90                          |
| K-FC5                          | Compressor        | 1905 kW                        | 3000 kW                          | 2.94                                           | 2.94                                        | 1   | 2.94                         | 2                         | 5.88                          |
| K-FC6                          | Compressor        | 13461 kW                       | 3000 kW                          | 3.99                                           | 9.82                                        | 1   | 9.82                         | 2                         | 19.63                         |
| K-FC7                          | Compressor        | 11473 kW                       | 3000 kW                          | 3.99                                           | 8.92                                        | 1   | 8.92                         | 2                         | 17.84                         |
| K-FC1                          | Compressor        | 13761 kW                       | 3000 kW                          | 3.99                                           | 9.95                                        | 1   | 9.95                         | 2                         | 19.89                         |
| K-FC2                          | Compressor        | 12755 kW                       | 3000 kW                          | 3.99                                           | 9.50                                        | 1   | 9.50                         | 2                         | 19.01                         |
| K-FC3                          | Compressor        | 12297 kW                       | 3000 kW                          | 3.99                                           | 9.30                                        | 1   | 9.30                         | 2                         | 18.60                         |
| K-FC4                          | Compressor        | 11649 kW                       | 3000 kW                          | 3.99                                           | 9.00                                        | 1   | 9.00                         | 2                         | 18.00                         |
| K-SC                           | Compressor        | 9125 kW                        | 3000 kW                          | 3.99                                           | 7.77                                        | 1   | 7.77                         | 2                         | 15.55                         |
| HE-FC1                         | Heat Exch.        | 182 m <sup>2</sup>             | 1000 m <sup>2</sup>              | 0.24                                           | 0.24                                        | 1   | 0.24                         | 1                         | 0.24                          |
| HE-FC2                         | Heat Exch.        | 208 m <sup>2</sup>             | 1000 m <sup>2</sup>              | 0.25                                           | 0.25                                        | 1   | 0.25                         | 1                         | 0.25                          |
| HE-FC3                         | Heat Exch.        | 197 m <sup>2</sup>             | 1000 m <sup>2</sup>              | 0.26                                           | 0.26                                        | 1   | 0.26                         | 1                         | 0.26                          |
| HE-FC4                         | Heat Exch.        | 95 m <sup>2</sup>              | 1000 m <sup>2</sup>              | 0.21                                           | 0.21                                        | 1   | 0.21                         | 1                         | 0.21                          |
| HE-FC5                         | Heat Exch.        | 104 m <sup>2</sup>             | 1000 m <sup>2</sup>              | 0.24                                           | 0.24                                        | 1   | 0.24                         | 1                         | 0.24                          |
| HE-FC6                         | Heat Exch.        | 1172 m <sup>2</sup>            | 1000 m <sup>2</sup>              | 0.71                                           | 0.78                                        | 1   | 0.78                         | 1                         | 0.78                          |
| HE-FC7                         | Heat Exch.        | 1458 m <sup>2</sup>            | 1000 m <sup>2</sup>              | 0.77                                           | 0.96                                        | 1   | 0.96                         | 1                         | 0.96                          |
| HE-DR1                         | Heat Exch.        | 7 m <sup>2</sup>               | 1000 m <sup>2</sup>              | 0.15                                           | 0.15                                        | 1   | 0.15                         | 1                         | 0.15                          |
| HE-DR2                         | Heat Exch.        | 66 m <sup>2</sup>              | 1000 m <sup>2</sup>              | 0.17                                           | 0.17                                        | 1   | 0.17                         | 1                         | 0.17                          |
| HE-DR3                         | Heat Exch.        | 307 m <sup>2</sup>             | 1000 m <sup>2</sup>              | 0.38                                           | 0.38                                        | 1   | 0.38                         | 1                         | 0.38                          |
| HE-DR4                         | Heat Exch.        | 16 m <sup>2</sup>              | 1000 m <sup>2</sup>              | 0.16                                           | 0.16                                        | 1   | 0.16                         | 1                         | 0.16                          |
| HE-MWS1                        | Heat Exch.        | 1567 m <sup>2</sup>            | 1000 m <sup>2</sup>              | 0.61                                           | 0.80                                        | 1   | 0.80                         | 1                         | 0.80                          |
| HE-MWS2                        | Heat Exch.        | 29 m <sup>2</sup>              | 1000 m <sup>2</sup>              | 0.14                                           | 0.14                                        | 1   | 0.14                         | 1                         | 0.14                          |
| HE-MWS3                        | Heat Exch.        | 25 m <sup>2</sup>              | 1000 m <sup>2</sup>              | 0.13                                           | 0.13                                        | 1   | 0.13                         | 1                         | 0.13                          |
| HE-MWS4                        | Heat Exch.        | 1635 m <sup>2</sup>            | 1000 m <sup>2</sup>              | 0.61                                           | 0.82                                        | 1   | 0.82                         | 1                         | 0.82                          |
| HE-RC                          | Heat Exch.        | 3760 m <sup>2</sup>            | 1000 m <sup>2</sup>              | 0.61                                           | 1.36                                        | 4   | 5.43                         | 1                         | 5.43                          |
| HE-PCC                         | Heat Exch.        | 50404 m <sup>2</sup>           | 1000 m <sup>2</sup>              | 0.61                                           | 6.45                                        | 1   | 6.45                         | 1                         | 6.45                          |

|         |             |                       |                     |      |       |   |       |   |       |
|---------|-------------|-----------------------|---------------------|------|-------|---|-------|---|-------|
| HE-MEA  | Heat Exch.  | 16910 m <sup>2</sup>  | 1000 m <sup>2</sup> | 0.61 | 3.35  | 1 | 3.35  | 1 | 3.35  |
| HE-FC1  | Heat Exch.  | 2909 m <sup>2</sup>   | 1000 m <sup>2</sup> | 0.61 | 1.16  | 1 | 1.16  | 1 | 1.16  |
| HE-FC2  | Heat Exch.  | 2128 m <sup>2</sup>   | 1000 m <sup>2</sup> | 0.61 | 0.97  | 1 | 0.97  | 1 | 0.97  |
| HE-FC3  | Heat Exch.  | 2014 m <sup>2</sup>   | 1000 m <sup>2</sup> | 0.63 | 0.96  | 1 | 0.96  | 1 | 0.96  |
| HE-FC4  | Heat Exch.  | 1534 m <sup>2</sup>   | 1000 m <sup>2</sup> | 0.68 | 0.88  | 1 | 0.88  | 1 | 0.88  |
| HE-TEG1 | Heat Exch.  | 88 m <sup>2</sup>     | 1000 m <sup>2</sup> | 0.20 | 0.20  | 1 | 0.20  | 1 | 0.20  |
| HE-TEG2 | Heat Exch.  | 14 m <sup>2</sup>     | 1000 m <sup>2</sup> | 0.12 | 0.12  | 1 | 0.12  | 1 | 0.12  |
| HE-SGU  | Heat Exch.  | 13 m <sup>2</sup>     | 1000 m <sup>2</sup> | 0.14 | 0.14  | 1 | 0.14  | 1 | 0.14  |
| HE-SC1  | Heat Exch.  | 2186 m <sup>2</sup>   | 1000 m <sup>2</sup> | 0.77 | 1.23  | 1 | 1.23  | 1 | 1.23  |
| HE-SC2  | Heat Exch.  | 1508 m <sup>2</sup>   | 1000 m <sup>2</sup> | 0.77 | 0.98  | 1 | 0.98  | 1 | 0.98  |
| Cd-MWS1 | Condenser   | 2 m <sup>2</sup>      | 1000 m <sup>2</sup> | 0.12 | 0.12  | 1 | 0.12  | 1 | 0.12  |
| Cd-MWS2 | Condenser   | 1058 m <sup>2</sup>   | 1000 m <sup>2</sup> | 0.61 | 0.63  | 1 | 0.63  | 1 | 0.63  |
| Cd-MWS3 | Condenser   | 582 m <sup>2</sup>    | 1000 m <sup>2</sup> | 0.43 | 0.43  | 1 | 0.43  | 1 | 0.43  |
| Cd-PCC  | Condenser   | 29273 m <sup>2</sup>  | 1000 m <sup>2</sup> | 0.61 | 4.65  | 1 | 4.65  | 1 | 4.65  |
| Cd-TEG  | Condenser   | 67 m <sup>2</sup>     | 1000 m <sup>2</sup> | 0.17 | 0.17  | 1 | 0.17  | 1 | 0.17  |
| Rb-MWS1 | Reboiler    | 162 m <sup>2</sup>    | 1000 m <sup>2</sup> | 0.78 | 0.78  | 1 | 0.78  | 1 | 0.78  |
| Rb-MWS2 | Reboiler    | 247 m <sup>2</sup>    | 1000 m <sup>2</sup> | 0.78 | 0.78  | 1 | 0.78  | 1 | 0.78  |
| Rb-MWS3 | Reboiler    | 93 m <sup>2</sup>     | 1000 m <sup>2</sup> | 0.72 | 0.72  | 1 | 0.72  | 1 | 0.72  |
| Rb-PCC  | Reboiler    | 8765 m <sup>2</sup>   | 1000 m <sup>2</sup> | 0.78 | 2.88  | 1 | 2.88  | 1 | 2.88  |
| Rb-TEG  | Reboiler    | 14 m <sup>2</sup>     | 1000 m <sup>2</sup> | 0.19 | 0.19  | 1 | 0.19  | 1 | 0.19  |
| PT-1    | Plate Exch. | 14866 m <sup>2</sup>  | 1000 m <sup>2</sup> | 0.77 | 3.87  | 1 | 3.87  | 1 | 3.87  |
| PT-2    | Plate Exch. | 9322 m <sup>2</sup>   | 1000 m <sup>2</sup> | 0.61 | 2.34  | 4 | 9.37  | 1 | 9.37  |
| PT-3    | Plate Exch. | 158029 m <sup>2</sup> | 1000 m <sup>2</sup> | 0.61 | 12.80 | 1 | 12.80 | 1 | 12.80 |
| HECE    | Heat Exch.  | 5 m <sup>2</sup>      | 1000 m <sup>2</sup> | 0.12 | 0.12  | 1 | 0.12  | 1 | 0.12  |
| HRSG    | Heat Exch.  | 6446 m <sup>2</sup>   | 1000 m <sup>2</sup> | 0.62 | 1.91  | 4 | 7.62  | 1 | 7.62  |
| P-FC1   | Pump        | 11.3 kW               | 300.0 kW            | 0.04 | 0.04  | 1 | 0.04  | 2 | 0.08  |
| P-FC2   | Pump        | 45.5 kW               | 300.0 kW            | 0.08 | 0.08  | 1 | 0.08  | 2 | 0.17  |
| P-FC3   | Pump        | 182.3 kW              | 300.0 kW            | 0.30 | 0.30  | 1 | 0.30  | 2 | 0.59  |
| P-FC4   | Pump        | 710.8 kW              | 300.0 kW            | 0.50 | 0.83  | 1 | 0.83  | 2 | 1.67  |
| P-MWS1  | Pump        | 0.091 kW              | 300.0 kW            | 0.02 | 0.02  | 1 | 0.02  | 2 | 0.05  |
| P-MWS2  | Pump        | 0.054 kW              | 300.0 kW            | 0.02 | 0.02  | 1 | 0.02  | 2 | 0.05  |
| P-MWS3  | Pump        | 2.0 kW                | 300.0 kW            | 0.03 | 0.03  | 1 | 0.03  | 2 | 0.05  |
| P-RC    | Pump        | 11.1 kW               | 300.0 kW            | 0.05 | 0.05  | 4 | 0.19  | 2 | 0.38  |
| P-PCC1  | Pump        | 110.6 kW              | 300.0 kW            | 0.13 | 0.13  | 1 | 0.13  | 2 | 0.27  |
| P-PCC2  | Pump        | 0.015 kW              | 300.0 kW            | 0.02 | 0.02  | 1 | 0.02  | 2 | 0.05  |

|              |             |           |          |        |        |    |        |   |        |
|--------------|-------------|-----------|----------|--------|--------|----|--------|---|--------|
| P-PPC3       | Pump        | 1.6 kW    | 300.0 kW | 0.03   | 0.03   | 1  | 0.03   | 2 | 0.05   |
| P-PCC4       | Pump        | 242.3 kW  | 300.0 kW | 0.24   | 0.24   | 1  | 0.24   | 2 | 0.47   |
| P-TEG1       | Pump        | 5.4 kW    | 300.0 kW | 0.04   | 0.04   | 1  | 0.04   | 2 | 0.09   |
| P-TEG2       | Pump        | 0.0001 kW | 300.0 kW | 0.02   | 0.02   | 1  | 0.02   | 2 | 0.05   |
| P-SC         | Pump        | 3714.8    | 300.0 kW | 0.50   | 2.25   | 1  | 2.25   | 2 | 4.50   |
| MWSC-1       | Column      | 36.5 m³   | 520.0 m³ | 0.16   | 0.16   | 1  | 0.16   | 1 | 0.16   |
| MWSC-2       | Column      | 118.9 m³  | 520.0 m³ | 0.83   | 0.83   | 1  | 0.83   | 1 | 0.83   |
| MWSC-3       | Column      | 71.7 m³   | 520.0 m³ | 0.65   | 0.65   | 1  | 0.65   | 1 | 0.65   |
| PCC Absorber | Column      | 665.0 m³  | 520.0 m³ | 4.66   | 5.40   | 1  | 5.40   | 1 | 5.40   |
| PCC Stripper | Column      | 1952.6 m³ | 520.0 m³ | 4.22   | 9.34   | 1  | 9.34   | 1 | 9.34   |
| TEG Absorber | Column      | 73.5 m³   | 520.0 m³ | 3.98   | 3.98   | 1  | 3.98   | 1 | 3.98   |
| TEG Stripper | Column      | 11.0 m³   | 520.0 m³ | 0.18   | 0.18   | 1  | 0.18   | 1 | 0.18   |
| V-FC1        | Vessel      | 418.3 m³  | 520.0 m³ | 2.73   | 2.73   | 1  | 2.73   | 1 | 2.73   |
| V-FC2        | Vessel      | 196.7 m³  | 520.0 m³ | 2.05   | 2.05   | 1  | 2.05   | 1 | 2.05   |
| V-FC3        | Vessel      | 88.2 m³   | 520.0 m³ | 1.66   | 1.66   | 1  | 1.66   | 1 | 1.66   |
| V-FC4        | Vessel      | 35.5 m³   | 520.0 m³ | 1.47   | 1.47   | 1  | 1.47   | 1 | 1.47   |
| V-FC1        | Vessel      | 14.4 m³   | 520.0 m³ | 0.15   | 0.15   | 1  | 0.15   | 1 | 0.15   |
| V-FC2        | Vessel      | 5.5 m³    | 520.0 m³ | 0.09   | 0.09   | 1  | 0.09   | 1 | 0.09   |
| V-FC3        | Vessel      | 2.3 m³    | 520.0 m³ | 0.08   | 0.08   | 1  | 0.08   | 1 | 0.08   |
| V-FC4        | Vessel      | 1.0 m³    | 520.0 m³ | 0.10   | 0.10   | 1  | 0.10   | 1 | 0.10   |
| V-FC5        | Vessel      | 0.7 m³    | 520.0 m³ | 0.22   | 0.22   | 1  | 0.22   | 1 | 0.22   |
| V-FC6        | Vessel      | 19.8 m³   | 520.0 m³ | 1.22   | 1.22   | 1  | 1.22   | 1 | 1.22   |
| V-DR1        | Vessel      | 18.6 m³   | 520.0 m³ | 3.98   | 3.98   | 1  | 3.98   | 1 | 3.98   |
| V-DR2        | Vessel      | 17.8 m³   | 520.0 m³ | 0.44   | 0.44   | 1  | 0.44   | 1 | 0.44   |
| V-EGR        | Vessel      | 4311.2 m³ | 520.0 m³ | 2.38   | 8.48   | 4  | 33.92  | 1 | 33.92  |
| VT1          | Vessel      | 3.4 m³    | 520.0 m³ | 0.11   | 0.11   | 1  | 0.11   | 1 | 0.11   |
| DMTM Reactor | Reactor     | 810.5 m³  | 520.0 m³ | 152.46 | 198.98 | 1  | 198.98 | 1 | 198.98 |
| LECC         | Heat Exch.  | 0.4 m³    | 520.0 m³ | 0.03   | 0.03   | 1  | 0.03   | 1 | 0.03   |
| EXP-DR       | Expander    | 11597 kW  | 4000 kW  | 3.28   | 6.21   | 1  | 6.21   | 2 | 12.43  |
| EXP-RC       | Expander    | 3089 kW   | 4000 kW  | 3.13   | 3.13   | 4  | 12.51  | 2 | 25.02  |
| GT           | Gas-Turbine |           |          | 15.93  | 15.93  | 16 | 254.88 | 2 | 509.76 |
| HVDC Cable   | HVDC Cable  |           |          |        |        |    |        |   | 244.39 |
| Rig Hull     | Rig hull    |           |          |        |        |    |        |   | 246.00 |
